# Supplementary material
Source: PubMed Central journal article supplement (PMC3662273)
Supplement: supp_WNL.0b013e31828c2f52_estimating_cerebral_microinfarct.pdf [file supp_WNL.0b013e31828c2f52_estimating_cerebral_microinfarct.pdf]

## Estimating cerebral microinfarct burden from autopsy samples

### تقدير عبء الاحتشاءات الدماغية المجهرية اعتماداً على عينات الطب الشرعي

#### الهدف:

تقدير إجمالي عبء الاحتشاءات الدماغية المجهرية بالاعتماد على عدد الاحتشاءات المجهرية الملاحظة في الفحص الطبي الشرعي الروتيني المجري بعد الوفاة.

#### الطرق:

طورنا طريقة حسابية بسيطة لتقدير العدد الإجمالي للاحتشاءات المخية المجهرية اعتماداً على التعداد الذي يتم الحصول عليه في الكمية الصغيرة من الأنسجة التي تُفحص بشكل روتيني في الفحص النسيجي الطبي الشرعي للدماغ. قمنا باشتقاق التقدير الإجمالي لعبء الاحتشاءات المجهرية اعتماداً على تشريح الطب الشرعي لعينات الدماغ لدى أقدم 648 جثة في دراستين حشديتين على أساس مجتمعي ذات طابع (سريري-تشريح مرضي) تدرسان الشيخوخة والعتة (الخرف).

#### النتائج:

نتائجنا تشير إلى أن ملاحظة احتشاءات مجهرية بعدد 1 أو 2 في 9 عينات تشريح مرضي عصبية روتينية يتوافق مع 552 أو 1,041 احتشاء مجهري كأعلى تقدير احتمالي ممكن في كامل الدماغ. تم الحصول على تقديرات مماثلة عند التحقق من صحة هذا التقدير في عينات مأخوذة من حجوم دماغية أكبر.

#### الاستنتاجات:

عبء كامل الدماغ من الاحتشاءات المجهرية الأساسي والذي يقترحه وجود احتشاءات مجهرية ولو بكمية قليلة في عينات التشريح المرضي الروتينية يشير إلى وجود آلية كامنة يمكن لهذه الآفات أن تسبب عن طريقها خللاً عصبياً في الأشخاص الذين لديهم أمراض أو عية صغيرة. النظام التقديري الذي تم تطويره هنا يمكن تعميمه إلى الترابط السريري – الأمراض مع الأمراض المجهرية سلبية التصوير الأخرى.

OBJECTIVE: To estimate whole-brain microinfarct burden from microinfarct counts in routine postmortem examination.

METHODS: We developed a simple mathematical method to estimate the total number of cerebral microinfarcts from counts obtained in the small amount of tissue routinely examined in brain autopsies. We derived estimates of total microinfarct burden from autopsy brain specimens from

648 older participants in 2 community-based clinical-pathologic cohort studies of aging and dementia.

**RESULTS:** Our results indicate that observing 1 or 2 microinfarcts in 9 routine neuropathologic specimens implies a maximum-likelihood estimate of 552 or 1,104 microinfarcts throughout the brain. Similar estimates were obtained when validating in larger sampled brain volumes.

**CONCLUSIONS:** The substantial whole-brain burden of cerebral microinfarcts suggested by even a few microinfarcts on routine pathologic sampling suggests a potential mechanism by which these lesions could cause neurologic dysfunction in individuals with small-vessel disease. The estimation framework developed here may generalize to clinicopathologic correlations of other imaging-negative micropathologies.

---

**Translator: Ahmad Al-Awwad MD, Damascus University, Damascus, Syria**

**Translation Reviewer: Nora Almuslim, Fellowship of Neurology, University of Dammam**

**King Fahad Hospital of the University, Neurology Department, Khobar, Kingdom of Saudi Arabia**
